# Supplementary material for: Antibiofilm Activity and Mechanism of Linalool against Food Spoilage Bacillus amyloliquefaciens
Source: MDPI journal article supplement (doi:10.3390/ijms241310980), 2023-07-01
Supplement: s1 [file s1]

**Table S1 Molecular docking results of linalool binned with potential targets.**

| No. | Receptor | Affinity<br>kcal/mol) | Number of<br>conventional H-bonds | Closest interacting residues                                                                         | Distance to<br>closest<br>interacting<br>residue (Å) |
|-----|----------|-----------------------|-----------------------------------|------------------------------------------------------------------------------------------------------|------------------------------------------------------|
| 1   | AbrB     | -4.8                  | 0                                 | Met1, Lys2, Ser3                                                                                     | Lys2(3.39)                                           |
| 2   | CodY     | -4.6                  | 0                                 | Met1, Ala2, Leu3, Gln5, Lys6                                                                         | Met1(2.71)                                           |
| 3   | ComER    | -4.7                  | 0                                 | Lys2, Ile3, Ala24, His29, Asp143,<br>Thr146, Leu147, Glu64, Ile65                                    | Met1(3.06)                                           |
| 4   | ComP     | -6.4                  | 0                                 | Met1, Arg2, Tyr3, Phe4, Ile5, Lys6,<br>Gly334, Arg337                                                | Tyr3(2.92)                                           |
| 5   | ComQ     | -4.8                  | 0                                 | Met1, Cys2, Leu3, Asp4, Phe46, Val50,<br>Leu290                                                      | Cys2(3.36)                                           |
| 6   | ComX     | -4.9                  | 1                                 | Met1, Cys2, Leu3, Asp4, Phe46, Leu290                                                                | Cys2(2.49)                                           |
| 7   | CwlO     | -4.7                  | 0                                 | Met1, Phe2, Ile3, Ile4, Glu5, Gly29,<br>Val33, Gln292, Glu296                                        | Met1(3.31)                                           |
| 8   | CysL     | -5.4                  | 0                                 | Met1, Tyr2, Glu5, Leu6, Asn38, Leu39,<br>Glu42                                                       | Met1(2.60)                                           |
| 9   | DegQ     | -3.8                  | 0                                 | Met1, Glu2, Lys3, Lys4, Leu5, Glu6                                                                   | Met1(3.01)                                           |
| 10  | DegU     | -4.4                  | 0                                 | Met1, Thr2, Lys3                                                                                     | Met1(2.55)                                           |
| 11  | EpsB     | -5.0                  | 0                                 | Met1, Gly2, Phe3, Arg4, Lys215,<br>Lys216, Lys217, Ile218, Lys219                                    | Lys217(2.89)                                         |
| 12  | epsG     | -5.1                  | 0                                 | Met1, Ile2, Val3, Tyr4, Val5, Val6,<br>Val56, Tyr147, Pro353, Ser356, Arg362,<br>Thr363              | Met1(2.63)                                           |
| 13  | FabF     | -5.2                  | 0                                 | Met1, Ser2, Lys3                                                                                     | Ser2(3.25)                                           |
| 14  | FabHA    | -5.6                  | 0                                 | Met1, Lys2, Ala3, Glu127, Gln129,<br>Pro168, Val169, Ser170, Asp171                                  | Lys2(3.26)                                           |
| 15  | FabHB    | -5.2                  | 0                                 | Met1, Ser2, Lys3, Asp170, Glu171                                                                     | Met1(4.13)                                           |
| 16  | FabI     | -5.1                  | 0                                 | Met1, Asn2, Phe3                                                                                     | Met1(3.43)                                           |
| 17  | FabL     | -5.3                  | 0                                 | Met1, Glu2, Gln3, Lys27, Tyr29, Ser229,<br>Ser230                                                    | Lys27(3.31)                                          |
| 18  | FbpC     | -5.2                  | 0                                 | Met1, Phe2, Trp3, Leu4, Phe5, Ile6,<br>Trp69, Tyr134                                                 | Leu4(3.26)                                           |
| 19  | FlgE     | -5.1                  | 0                                 | Met1, Leu2, Arg3, Ser4, Leu5, Tyr6,<br>Ser246, Leu250                                                | Met1(3.49)                                           |
| 20  | FtsE     | -5.2                  | 0                                 | Met1, Ile2, Glu3, Met24, Ile25, His26,<br>Pro27, Glu29, Val31, Leu60, Ile61,<br>Asn62, His63, Arg206 | Met1(2.77)                                           |
| 21  | GalE     | -5.2                  | 1                                 | Met1, Ala2, Ile3, Gly24, Tyr25, Glu26,<br>Glu75                                                      | Ala2(2.23)                                           |

|    |       |      |   |                                                                                                             |              |
|----|-------|------|---|-------------------------------------------------------------------------------------------------------------|--------------|
| 22 | GapB  | -4.5 | 0 | Met1, Lys2, Val3, Gln26, Pro337,<br>Ser338, Val340                                                          | Met1(3.19)   |
| 23 | GtaB  | -5.5 | 0 | Met1, Lys2, Lys3, Leu153                                                                                    | Met1(2.27)   |
| 24 | Hag   | -4.3 | 1 | Met1, Arg2, Ile3, Asn4, His5, Leu326                                                                        | Asn4(3.04)   |
| 25 | Icd   | -5.2 | 0 | Met1, Ser2, Gln3, Ile21, Thr57, Trp58,<br>Lys59, Glu60,                                                     | Lys59(4.43)  |
| 26 | KinC  | -5.3 | 0 | Met1, Gly2, Gln5, Ala6, Ile9, Lys59                                                                         | Met1(2.35)   |
| 27 | KinD  | -5.6 | 0 | Met1, Asn2, Thr3, Phe4                                                                                      | Met1(3.22)   |
| 28 | LeuA  | -6.0 | 1 | Met1, Ser2, Asn3, Lys4, Ala5                                                                                | Met1(3.23)   |
| 29 | LuxS  | -3.9 | 1 | Met1, Pro2, Ser3, Glu8                                                                                      | Met1(2.20)   |
| 30 | MalP  | -5.2 | 0 | Met1, Met2, Gln3, Lys4, Val5, Gln6                                                                          | Met1(3.15)   |
| 31 | MecA  | -5.0 | 0 | Met1, Trp2, Thr3, Glu4, Trp5                                                                                | Met1(2.97)   |
| 32 | MstX  | -4.5 | 0 | Met1, Lys2, Val3                                                                                            | Met1(2.41)   |
| 33 | PhrC  | -3.9 | 0 | Met1, Lys2, Leu3, Lys4, Ser5                                                                                | Met1(2.45)   |
| 34 | PrmC  | -5.4 | 0 | Met1, Lys2, Thr3, Pro47, Val48, Leu53                                                                       | Lys2(3.87)   |
| 35 | PtkA  | -4.8 | 0 | Met1, Leu2, Thr3, Pro47, Gly187                                                                             | Leu2(3.85)   |
| 36 | PyrG  | -4.6 | 0 | Met1, Thr2, Lys3, Asp136, Asn169,<br>Met265, Lys266, Leu267, Glu268                                         | Leu267(3.33) |
| 37 | RapA  | -5.5 | 0 | Met1, Lys2, Gln3, Thr4                                                                                      | Lys2(3.30)   |
| 38 | RapC  | -5.6 | 0 | Met1, Lys2, Ser3                                                                                            | Met1(3.57)   |
| 39 | ResD  | -4.7 | 0 | Met1, Asp2, Gln3, Thr4, Asn5                                                                                | Met1(2.81)   |
| 40 | ResE  | -4.9 | 2 | Lys1, Phe2, Trp3, Lys4, Ser5, Gly8                                                                          | Trp3(3.63)   |
| 41 | SdhA  | -5.5 | 0 | Met1, Ser2, Gln3, Glu418                                                                                    | Met1(3.16)   |
| 42 | SinI  | -4.6 | 0 | Met1, Lys2, Asn3                                                                                            | Met1(2.85)   |
| 43 | sinR  | -5.3 | 0 | Met1, Thr2, Leu3, Ile4, Gly5, Asn39,<br>Thr42, Leu63, Leu64, Asp65, Lys67                                   | Met1(2.29)   |
| 44 | SipW  | -4.8 | 0 | Met1, Lys2, Lys3, Thr4, Leu5, Lys6                                                                          | Met1(2.80)   |
| 45 | SlrR  | -5.2 | 0 | Met1, Ile2, Gly3, Arg4, Ile5, Leu61,<br>Phe62, Ala64, Glu65, Thr66, Met67,<br>His69                         | Ile2(2.72)   |
| 46 | SpeB  | -4.7 | 0 | Met1, Arg2, Phe3, Asp4, Glu5, Ala6,<br>Ala14, Arg16, Ala67                                                  | Met1(2.82)   |
| 47 | Spo0F | -4.5 | 0 | Met1, Met2, Asn3, Lys122                                                                                    | Met1(2.94)   |
| 48 | SpoVG | -4.7 | 0 | Met1, Glu2, Val3, Leu25, Asp26, Thr68,<br>Lys71                                                             | Met1(3.36)   |
| 49 | TapA  | -4.9 | 0 | Met1, Phe2, Arg3                                                                                            | Phe2(2.37)   |
| 50 | TasA  | -6.3 | 2 | Met1, Gly2, Met3, Lys4, Lys5, Lys6,<br>Asp36, Leu57, Ser58, Asn59, Lys93,<br>Asn220, Ala221, Ile222, Ser223 | Met1(2.51)   |
| 51 | ThrB  | -5.0 | 0 | Met1, Asn2, Glu3, Glu5                                                                                      | Met1(2.87)   |

|    |       |      |   |                                                                                                       |             |
|----|-------|------|---|-------------------------------------------------------------------------------------------------------|-------------|
| 52 | TrxA  | -5.5 | 0 | Met1, Ser2, Tyr390, Gln399, Asp420,<br>Leu422, Gln423                                                 | Met1(3.70)  |
| 53 | Veg   | -4.5 | 0 | Met1, Ala2, Lys3                                                                                      | Ala2(2.41)  |
| 54 | YaaB  | -4.3 | 0 | Met1, Tyr2, Ile3, Ser12, Thr13, Arg14,<br>Met76                                                       | Met1(3.06)  |
| 55 | Ydak  | -4.7 | 0 | Met1, Lys2, Ile3, Ser4, Phe5, Asn6,<br>Ser119, Leu123                                                 | Met1(2.20)  |
| 56 | YlzA  | -3.9 | 0 | Met1, Thr2, Ile3                                                                                      | Met1(2.83)  |
| 57 | YmcA  | -4.5 | 0 | Met1, Thr2, Leu3                                                                                      | Met1(2.75)  |
| 58 | YmdB  | -4.8 | 0 | Met1, Arg2, Ile3, His32, Asn106,<br>Lys108, Tyr144, Ile239, Asp240, Ile241,<br>Asp242, Asp243, Gln244 | Met1(3.31)  |
| 59 | YpqP  | -4.8 | 0 | Met1, Gly2, Ala3, Thr4, Lys5, Leu6                                                                    | Met1(3.35)  |
| 60 | YtrA  | -4.3 | 0 | Met1, Ile2, Leu23, Ile28, Pro36, Leu41,<br>Ile44, Ile45                                               | Met1(2.80)  |
| 61 | YtrB  | -5.0 | 0 | Met1, Ile2, Glu3, Thr23, Ile24, Gly25,<br>Lys26, Glu28, Leu59, Phe60, Asn61,<br>Gln62, Arg196         | Ile24(3.03) |
| 62 | YtrC1 | -5.3 | 0 | Met1, Val2, Gly3, Leu4, Phe5, Ile53,<br>Leu54, Val92, Phe96                                           | Met1(2.48)  |
| 63 | YtrC2 | -5.4 | 0 | Met1, Ile2, Gln103, Tyr248                                                                            | Met1(2.58)  |
| 64 | YtrD  | -6.2 | 0 | Met1, Asn2, Met3, Phe4, Gly15, Tyr18                                                                  | Met1(4.18)  |
| 65 | YtrE  | -5.2 | 1 | Met1, Ile2, Asp3, Thr31, Val32, Glu33,<br>Lys34, Val67, Ile68, Asn69, Gly70                           | Glu33(3.14) |
| 66 | YtrF  | -4.8 | 0 | Met1, Arg2, Phe3, Asp5, Gln6, Ile339                                                                  | Met1(3.68)  |
| 67 | YugO  | -5.1 | 0 | Met1, Lys2, Ser3, Arg5                                                                                | Met1(4.05)  |
